# Supplementary material
Source: MDPI journal article supplement (https://www.mdpi.com/2073-4344/13/2/385)
Supplement: s1 [file s1]

# F,O,S-codoped graphitic carbon nitride as an efficient photocatalyst for the synthesis of benzoxazoles and benzimidazoles

Alberto Santiago-Aliste <sup>1</sup>, Eva Sánchez-Hernández <sup>1</sup>, Celia Andrés-Juan <sup>2</sup>, Pedro Chamorro-Posada <sup>3</sup>, Guillermo Antorrena <sup>4</sup>, Jesús Martín-Gil <sup>1</sup> and Pablo Martín-Ramos <sup>1,\*</sup>

<sup>1</sup> Department of Agricultural and Forestry Engineering, ETSIIAA, Universidad de Valladolid, Avenida de Madrid 44, 34004 Palencia, Spain

<sup>2</sup> GIR Asymmetric Synthesis, Universidad de Valladolid; Campus Miguel Delibes, Paseo Belén 7, 47011 Valladolid, Spain

<sup>3</sup> Department of Theory of Signal and Communications and Telematic Engineering, ETSIT, Universidad de Valladolid, Paseo de Belén 15, 47011 Valladolid, Spain

<sup>4</sup> Laboratorio de Microscopias Avanzadas (LMA), Universidad de Zaragoza, Edificio I+D Campus Río Ebro, C/Mariano Esquillor s/n, 50018 Zaragoza, Spain

## SUPPLEMENTARY MATERIAL

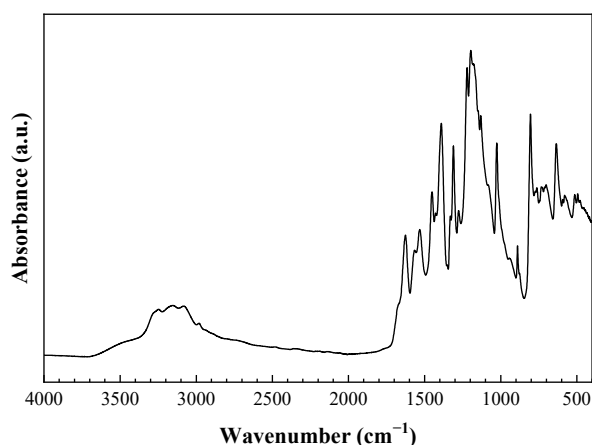

Figure S1. ATR-FTIR spectrum of F,O,S-codoped g-C<sub>3</sub>N<sub>4</sub>.

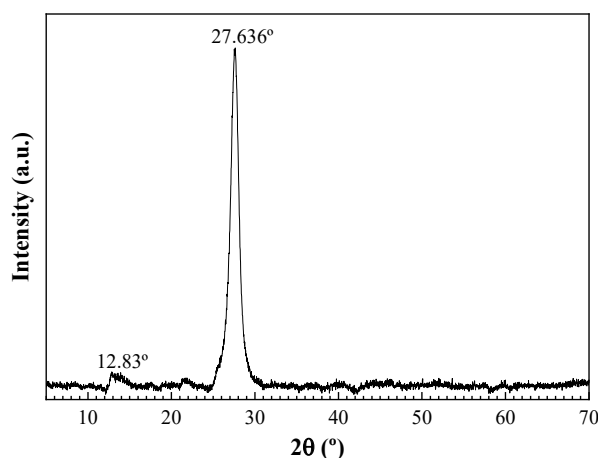

Figure S2. X-ray powder diffraction pattern of F,O,S-codoped g-C<sub>3</sub>N<sub>4</sub>.

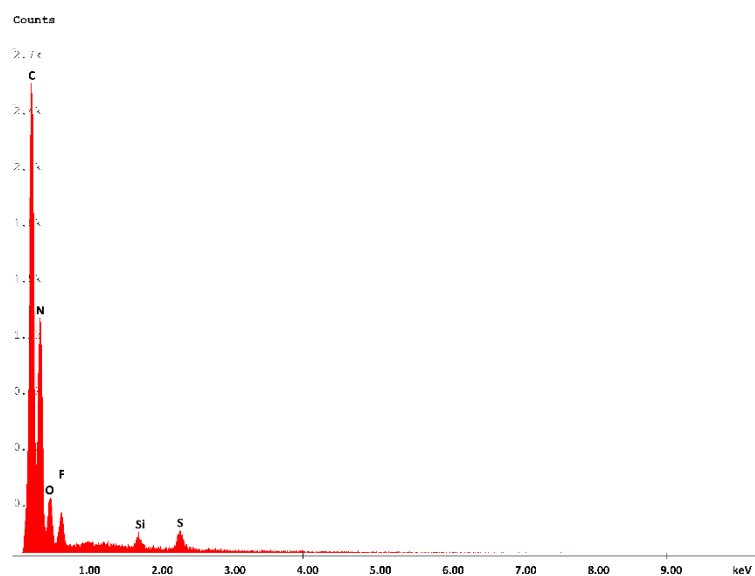

**Figure S3.** EDS analysis of F,O,S-codoped g-C<sub>3</sub>N<sub>4</sub>

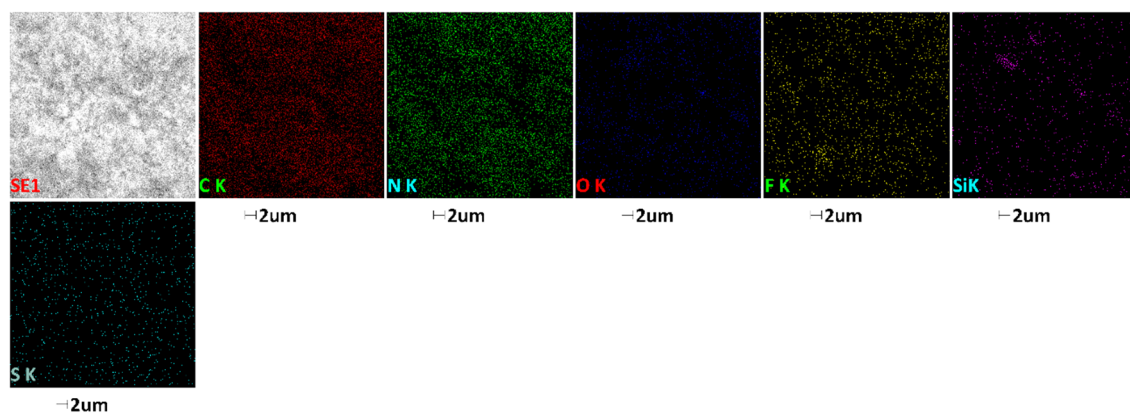

**Figure S4.** EDS analysis of F,O,S-codoped g-C<sub>3</sub>N<sub>4</sub>: elemental mapping.

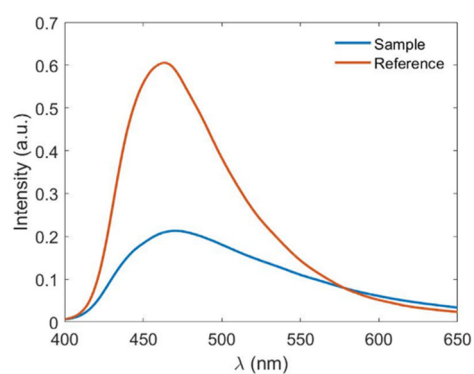

**Figure S5.** Comparison of the luminescence spectrum of F,O,S-codoped g-C<sub>3</sub>N<sub>4</sub> and pristine g-C<sub>3</sub>N<sub>4</sub>.

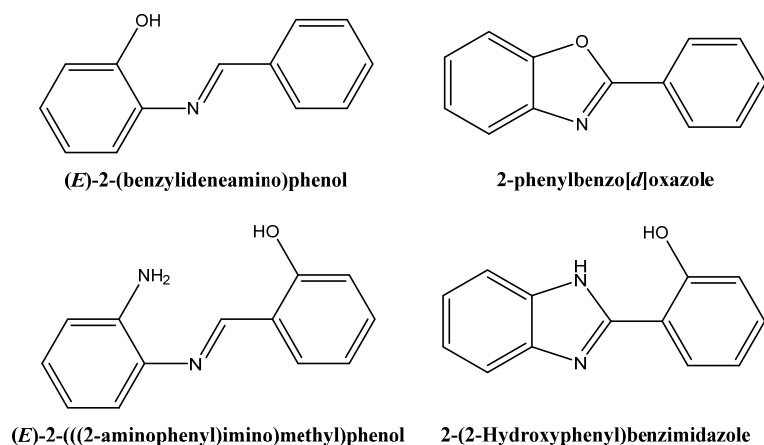

**Figure S6.** Intermediate and desired products considered in the selectivity evaluation.

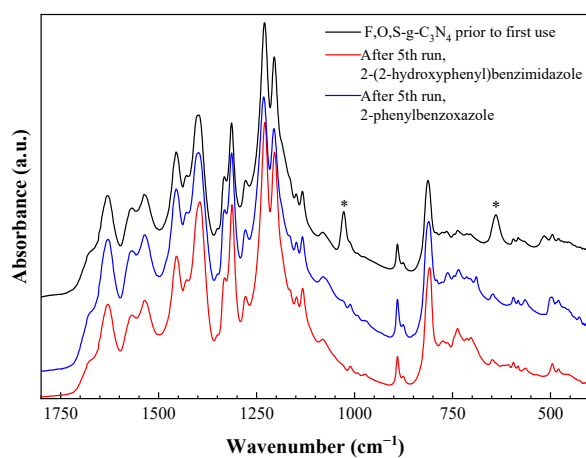

**Figure S7.** ATR-FTIR spectra of the F,O,S-codoped g-C<sub>3</sub>N<sub>4</sub> photocatalyst before 1<sup>st</sup> use and after 5 runs.

**Table S1.** CHNS elemental analysis results of F,O,S-codoped g-C<sub>3</sub>N<sub>4</sub>.

| Sample                                    | C %        | N %        | H %       | S %       | (O % + F%)   |
|-------------------------------------------|------------|------------|-----------|-----------|--------------|
| Doped g-C <sub>3</sub> N <sub>4</sub> (1) | 27.51      | 41.36      | 2.43      | 1.12      | (27.58)      |
| Doped g-C <sub>3</sub> N <sub>4</sub> (2) | 27.37      | 41.14      | 2.07      | 1.06      | (28.36)      |
| Doped g-C <sub>3</sub> N <sub>4</sub> (3) | 27.28      | 41.16      | 2.11      | 1.01      | (28.44)      |
| mean±SD                                   | 27.39±0.12 | 41.22±0.12 | 2.20±0.20 | 1.06±0.06 | (28.12±0.48) |
| Sulfamethazine standard                   | 51.86      | 20.13      | 5.05      | 11.41     | (11.55)      |
| Sulfamethazine sample                     | 51.90      | 20.17      | 5.07      | 11.32     | (11.58)      |
